# Supplementary material
Source: MDPI journal article supplement (https://www.mdpi.com/2079-6439/12/5/44)
Supplement: s1 [file s1]

## Supporting Information

# Optimizing Synergistic Silica-Zinc Oxide Coating for Enhanced Flammability Resistance in Cotton Protective Clothing

Sidra Saleemi <sup>1,\*</sup>, Hafiz Abdul Mannan <sup>1,\*</sup>, and Tabinda Riaz <sup>1</sup>, Abdul Moqeeet Hai <sup>1</sup>, Hassan Zeb <sup>2</sup>, and Amber Khalil Khan <sup>3</sup>

<sup>1</sup> Institute of Polymer and Textile Engineering, University of the Punjab, Quaid-e-Azam Campus, P.O. Box 54590, Lahore, Pakistan; sidraatif.ipte@pu.edu.pk (S.S.); hmannan.ipte@pu.edu.pk (H.A.M.); tabindaatif.ipte@pu.edu.pk (T.R.); moqeeet.ipte@pu.edu.pk (A.M.H.)

<sup>2</sup> Institute of Energy and Environmental Engineering, University of the Punjab, Quaid-e-Azam Campus, P.O. Box 54590, Lahore, Pakistan; hassanzeb.ieee@pu.edu.pk (H.Z.)

<sup>3</sup> Department of Textile Engineering, Mehran University of Engineering and Technology, Jamshoro, Sindh, Pakistan; amber.khan@gmail.com (A.K.K.)

\* Correspondence: sidraatif.ipte@pu.edu.pk (S.S.); hmannan.ipte@pu.edu.pk (H.A.M.); Tel.: +924299230572 (S.S. and H.A.M.)

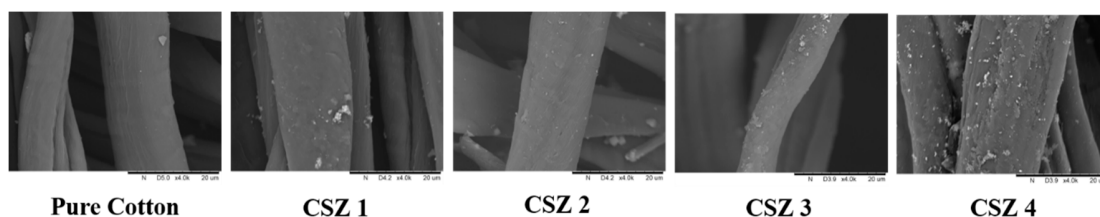

Figure S1: SEM images of Pure and Treated Cotton at Higher Magnification.

Table S1: Comparison of flammability properties of FR finished materials via Sol-gel.

| Sr. No. | Additive                                | TGA in Nitrogen (T <sub>max</sub> °C) | Time to Ignite (s) | Flame-Spread Time (s) | Weight Per unit Area (g/m <sup>2</sup> ) | Ref.      |
|---------|-----------------------------------------|---------------------------------------|--------------------|-----------------------|------------------------------------------|-----------|
| 01      | TiO <sub>2</sub>                        | 346                                   | --                 | --                    | 98                                       | [1]       |
| 02      | SiO <sub>2</sub><br>(By Dipping)        | --                                    | 22                 | --                    | 200                                      | [2]       |
| 03      | SiO <sub>2</sub><br>(By vertical Spray) | --                                    | 30                 | --                    | 200                                      | [2]       |
| 04      | MgO                                     | 422                                   | --                 | --                    | 117                                      | [3]       |
| 05      | SiO <sub>2</sub>                        |                                       |                    | 13.6                  | 139                                      | [4]       |
| 06      | boron-doped titania sol                 | 346                                   | 10                 | 2                     | 180                                      | [5]       |
| 07      | phosphorous/nitrogen-based sol          | 310                                   | 34±2               | 48                    | 273                                      | [6]       |
| 08      | 0.25% SiO <sub>2</sub> + 0.25% ZnO      | 413                                   | 4                  | 17                    | 155                                      | This Work |
| 09      | 0.5% SiO <sub>2</sub> + 0.25% ZnO       | 428                                   | 5                  | 21                    | 155                                      |           |
| 10      | 0.25% SiO <sub>2</sub> + 0.5% ZnO       | 420                                   | 5                  | 19                    | 155                                      |           |

|    |                                  |     |   |    |     |
|----|----------------------------------|-----|---|----|-----|
| 11 | 0.5% SiO <sub>2</sub> + 0.5% ZnO | 428 | 6 | 20 | 155 |
|----|----------------------------------|-----|---|----|-----|

The flame-retardant coatings having nanoparticles via sol-gel were compared with previous studies in Table S1. It was summarized that all coatings have good influence on flame-retardant properties. We found that the TGA of our samples were higher than the other coating materials reported in literature. It shows that these coating with the combination of silica and zinc nanoparticles effectively improved the flame-retardant properties. Similarly, the results of time to ignite were also comparable in this research work.

## References

1. Shen, R., et al., *Thermal stability and flammability of cotton fabric with TiO<sub>2</sub> coatings based on biomineralization*. Materials Chemistry and Physics, 2022. **282**: p. 125986.
2. Alongi, J., et al., *Layer by Layer coatings assembled through dipping, vertical or horizontal spray for cotton flame retardancy*. Carbohydrate polymers, 2013. **92**(1): p. 114-119.
3. Ji, W., et al., *Mg (OH) 2 and PDMS-coated cotton fabrics for excellent oil/water separation and flame retardancy*. Cellulose, 2019. **26**: p. 6879-6890.
4. Rajendran, V., et al., *Enhancement of thermal stability, flame retardancy, and antimicrobial properties of cotton fabrics functionalized by inorganic nanocomposites*. Industrial & Engineering Chemistry Research, 2014. **53**(50): p. 19512-19524.
5. Bentis, A., A. Boukhriss, and S. Gmouh, *Flame-retardant and water-repellent coating on cotton fabric by titania–boron sol–gel method*. Journal of Sol-Gel Science and Technology, 2020. **94**: p. 719-730.
6. Castellano, A., et al., *Synthesis and characterization of a phosphorous/nitrogen based sol-gel coating as a novel halogen-and formaldehyde-free flame retardant finishing for cotton fabric*. Polymer Degradation and Stability, 2019. **162**: p. 148-159.
